# Supplementary material
Source: PubMed Central journal article supplement (PMC4525768)

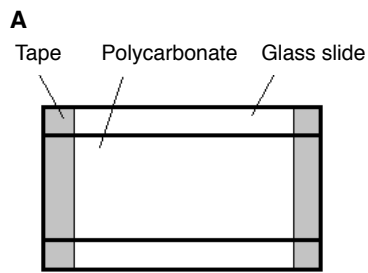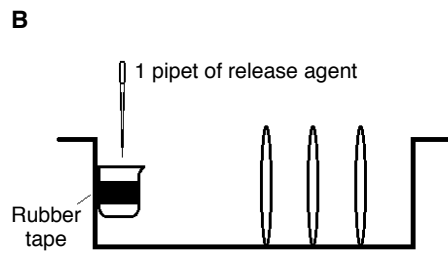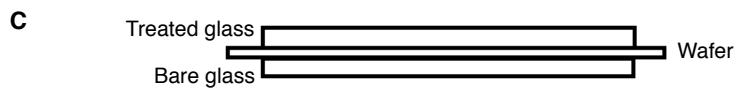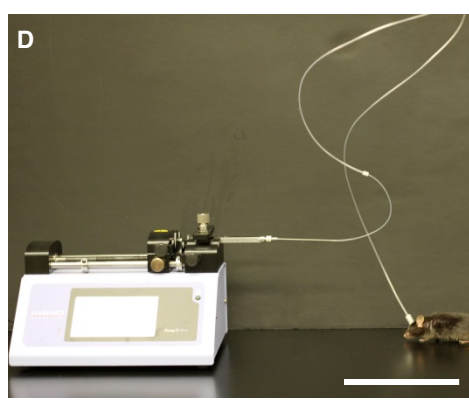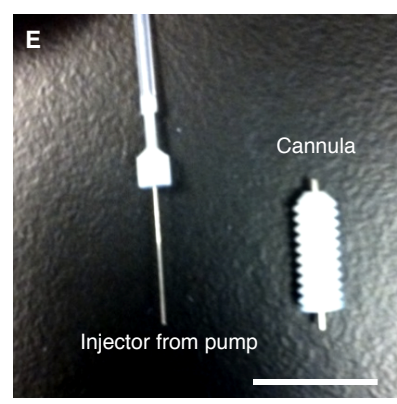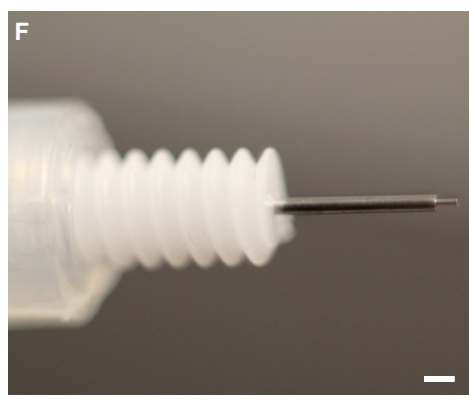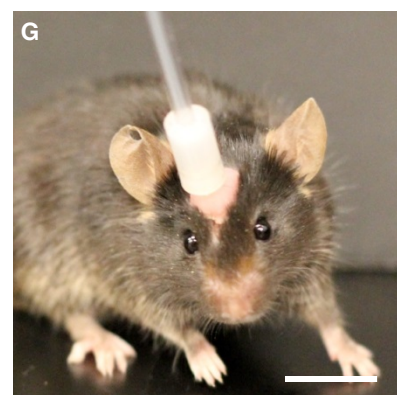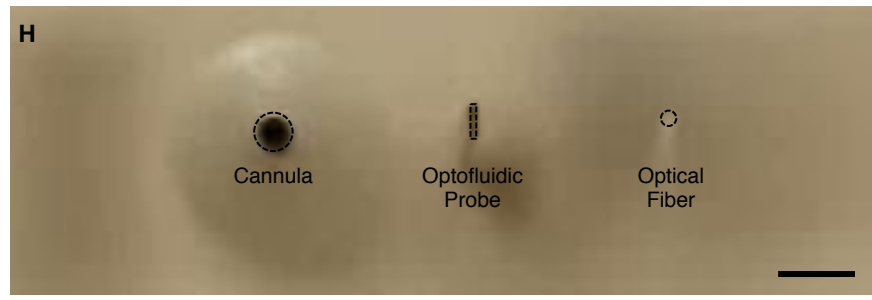

Supplement: NIHMS706901-supplement-1.pdf [file NIHMS706901-supplement-1.pdf]

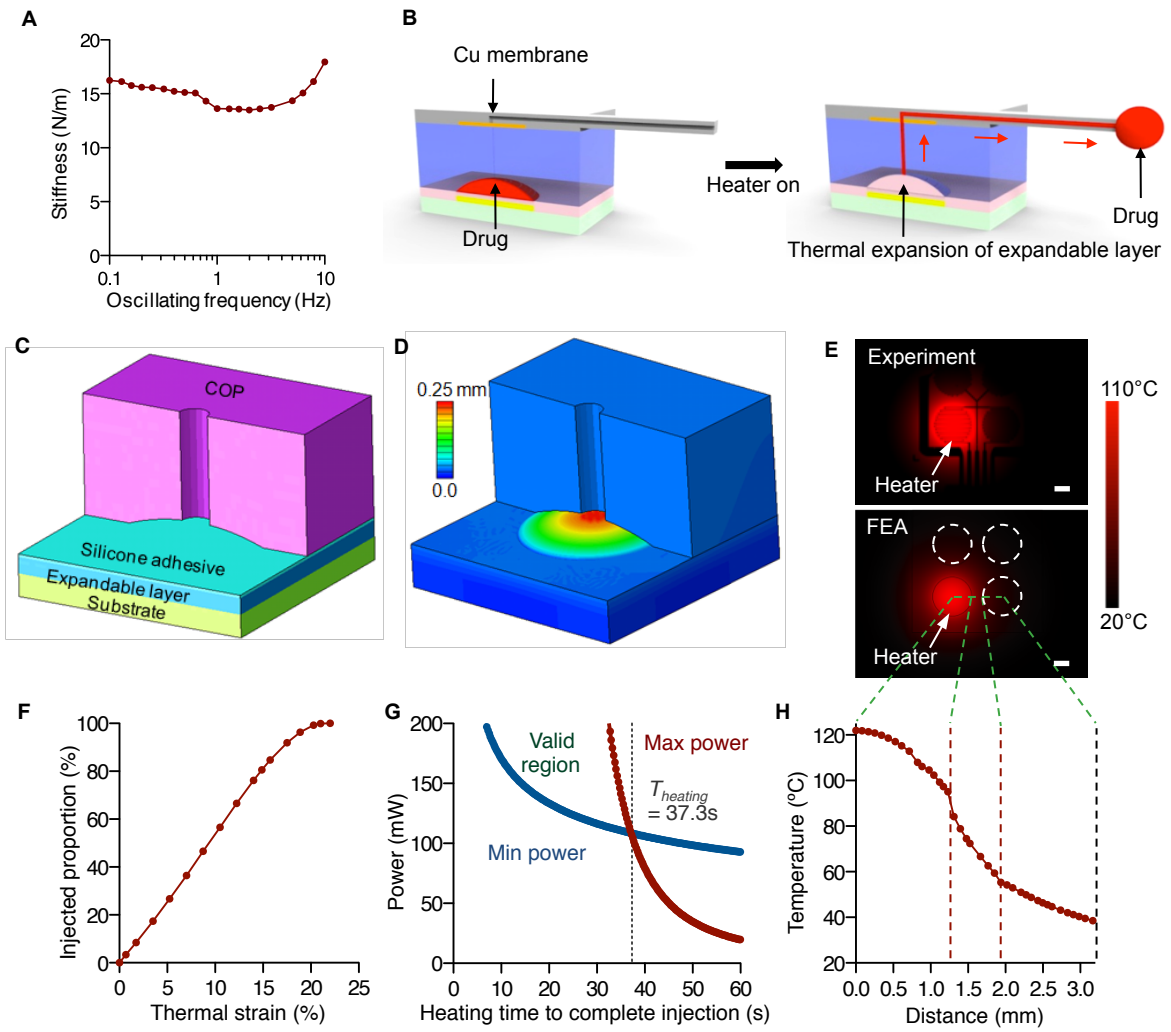

Supplement: NIHMS706901-supplement-2.pdf [file NIHMS706901-supplement-2.pdf]

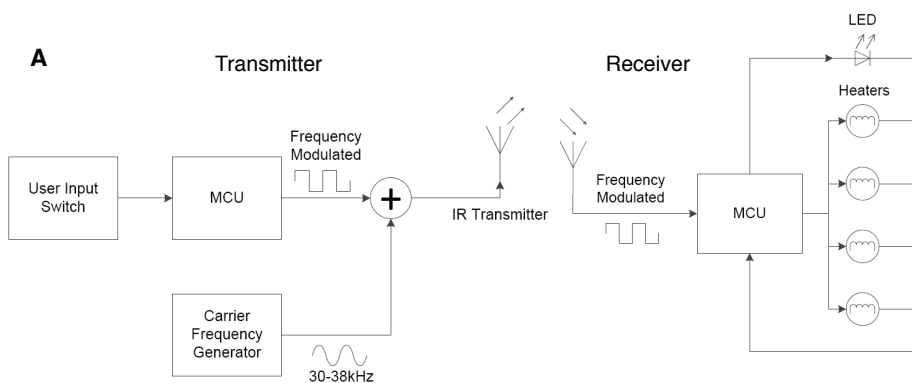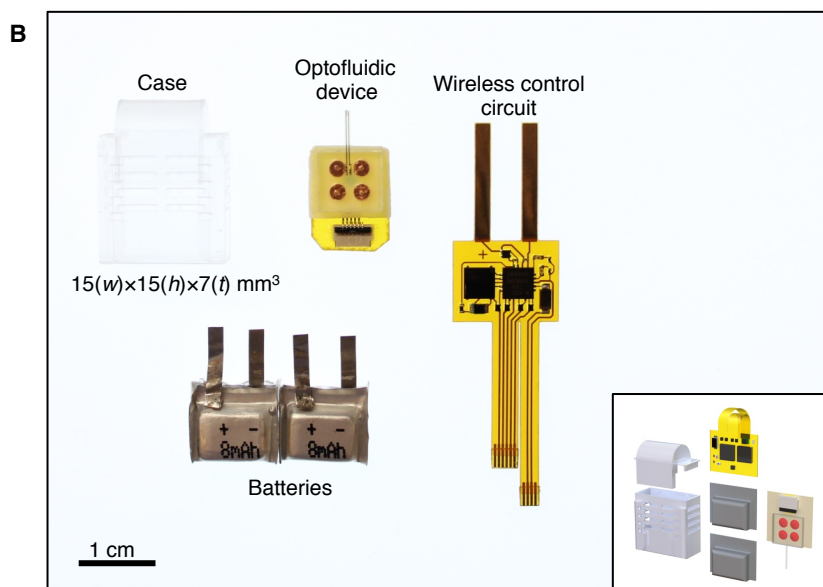

**C**

| Component          | Weight (g) |
|--------------------|------------|
| Package Case       | 0.705      |
| Battery (2)        | 0.66       |
| PCB                | 0.15       |
| Optofluidic Device | 0.34       |
| Total              | 1.855      |

Supplement: NIHMS706901-supplement-3.pdf [file NIHMS706901-supplement-3.pdf]

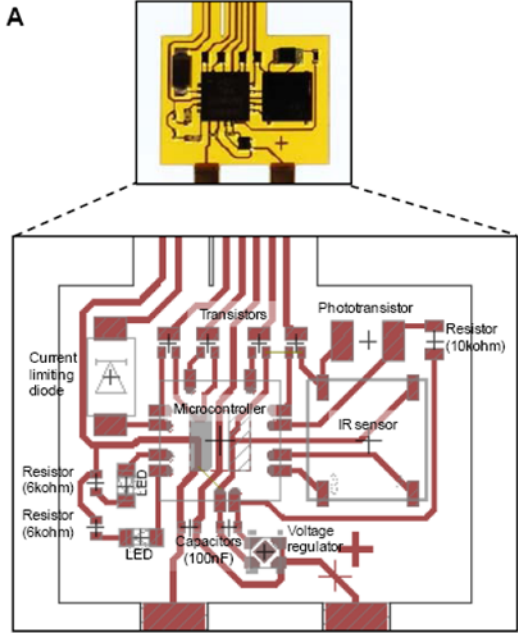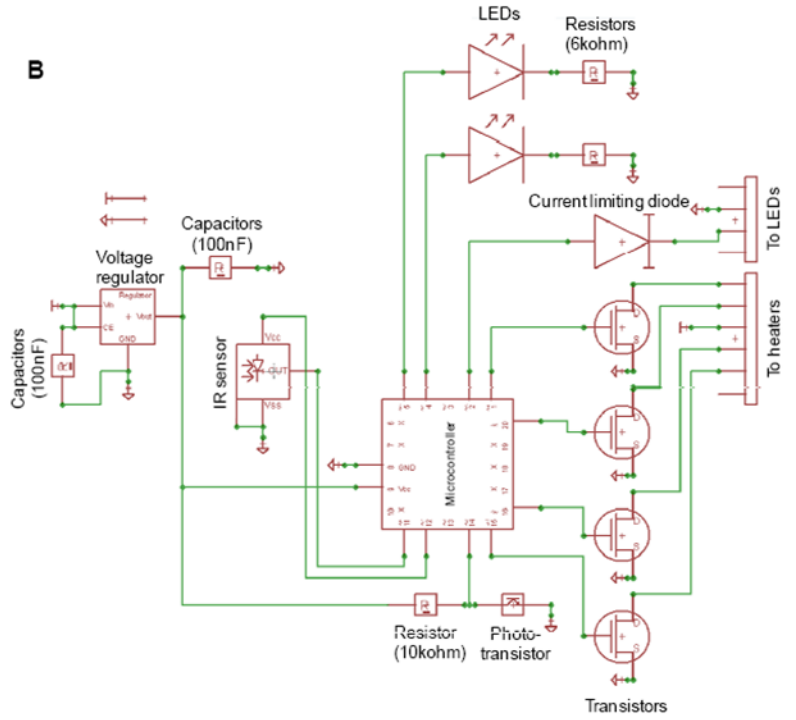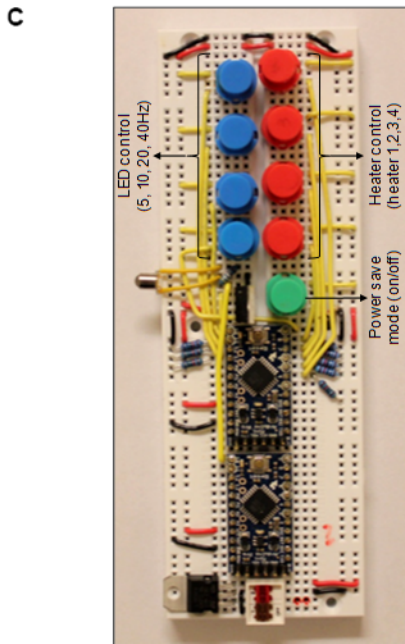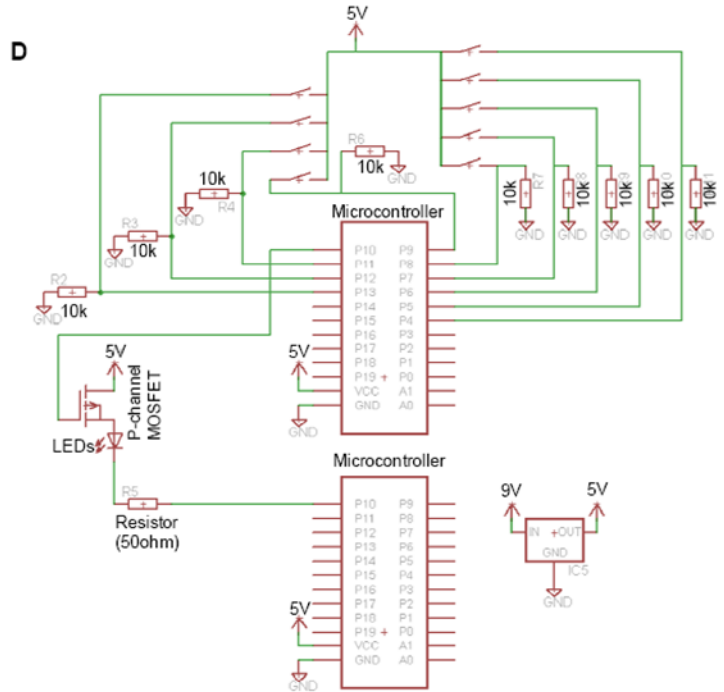

Supplement: NIHMS706901-supplement-4.pdf [file NIHMS706901-supplement-4.pdf]

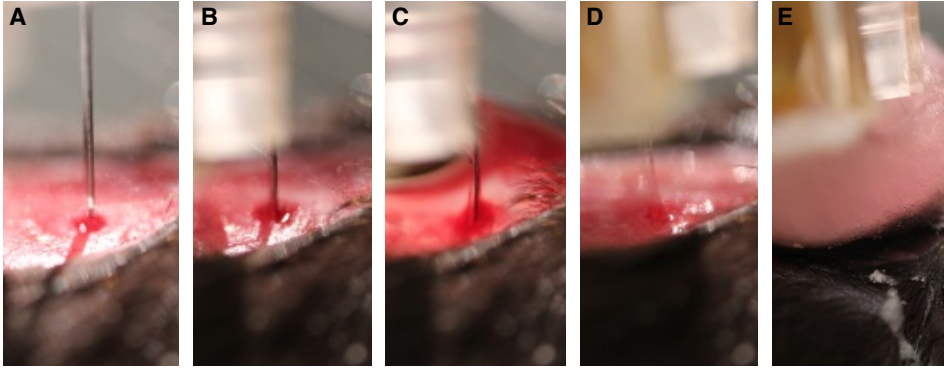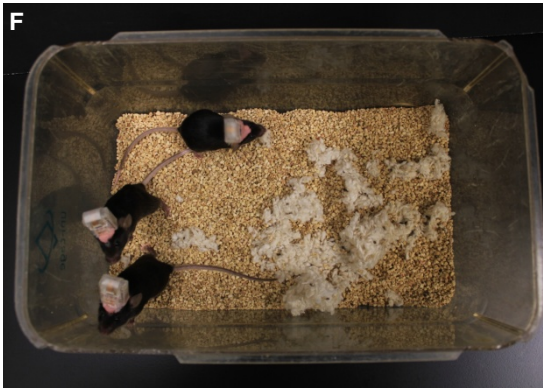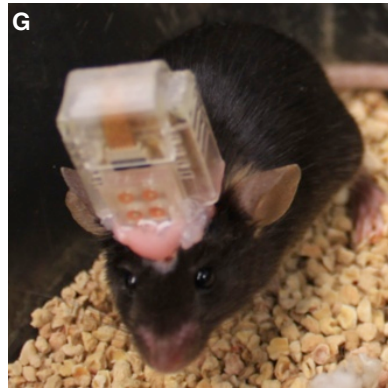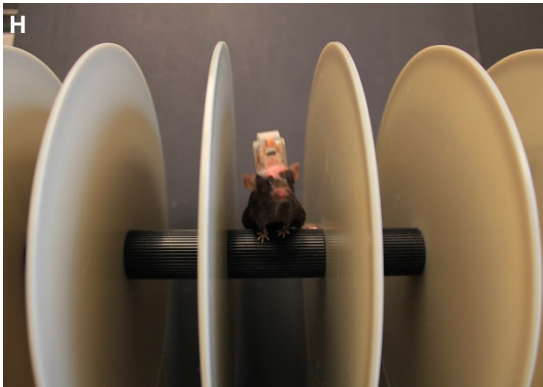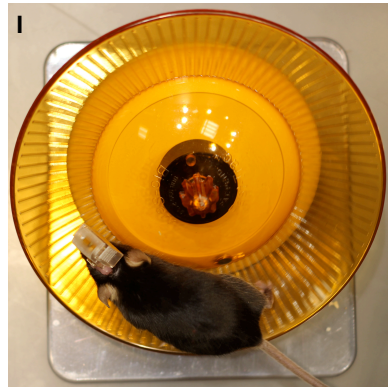

Supplement: NIHMS706901-supplement-5.pdf [file NIHMS706901-supplement-5.pdf]

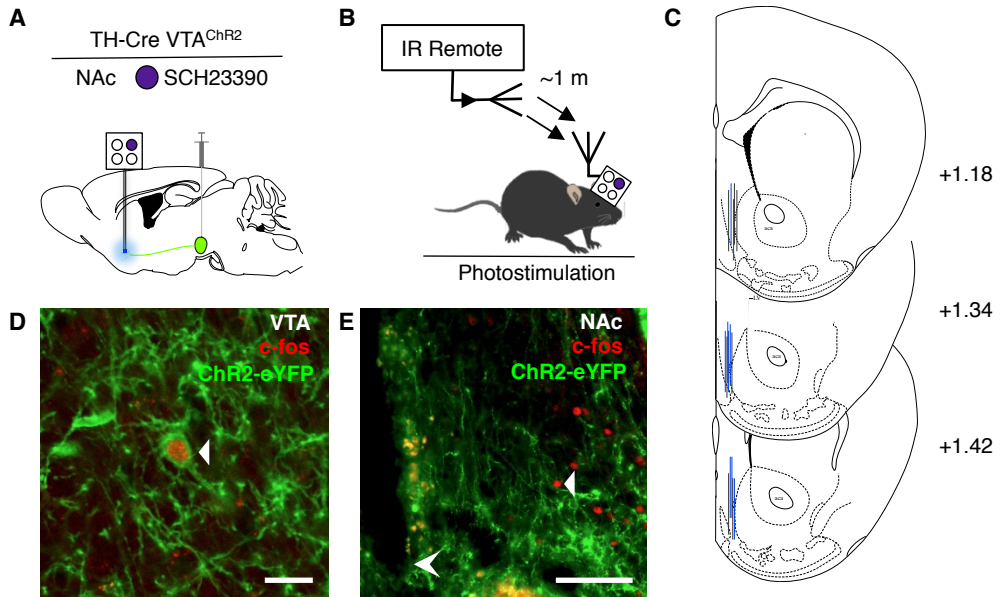

Supplement: NIHMS706901-supplement-6.pdf [file NIHMS706901-supplement-6.pdf]
